# The role of cytomegalovirus in prostate cancer incidence and mortality

Johanna Classon<sup>1</sup>, Abigail Britten<sup>2</sup>, Kanar Alkass<sup>3</sup>, Henrik Druid<sup>3</sup>, Nicole Brenner<sup>4</sup>, Tim Waterboer<sup>4</sup>, Nicholas J Wareham<sup>2</sup>, Effrossyni Gkrania-Klotsas<sup>2,5\*</sup> and Jonas Frisén<sup>1\*</sup>

<sup>1</sup> Department of Cell and Molecular Biology, Karolinska Institutet, Stockholm, Sweden

<sup>2</sup> Medical Research Council Epidemiology Unit, University of Cambridge, Cambridge, UK

<sup>3</sup> Department of Oncology-Pathology, Karolinska Institutet, Sweden

<sup>4</sup> Infections and Cancer Epidemiology Division, Deutsches Krebsforschungszentrum, DKFZ, Germany

<sup>5</sup> Department of Medicine, Cambridge Biomedical Research Centre, Cambridge, UK

\* Joint last author

Address correspondence to Jonas Frisén, [Jonas.frisen@ki.se](mailto:Jonas.frisen@ki.se) and Effrossyni Gkrania-Klotsas, [egkraniaklotsas@nhs.net](mailto:egkraniaklotsas@nhs.net)

**Keywords:** Epidemiology; Cytomegalovirus; Prostate cancer incidence; prostate cancer mortality

**Word count text:** 5346

**Word count abstract:** 260

26 **ABSTRACT**

27 Prostate cancer is one of the most common cancers in men with over 350 000 prostate  
28 cancer deaths reported worldwide every year. Current risk stratification models are  
29 insufficient to predict prostate cancer and prostate cancer death. New biomarkers are  
30 needed to identify those at increased risk of lethal prostate cancer. Cytomegalovirus  
31 (CMV) infection is common in the healthy prostate epithelium and promotes cell  
32 proliferation and viability in prostate cancer. Analyzing matched serum and tissue  
33 samples from post-mortem donors (n=41) and prostate cancer patients (n=40), we  
34 report that CMV seropositivity predicts high CMV abundance in prostate tissue. We  
35 studied if CMV seropositive men had increased prostate cancer incidence and cancer  
36 mortality in the European Prospective Investigation of Cancer (EPIC)–Norfolk  
37 population-based cohort study. CMV IgG serostatus was determined between 1993  
38 and 2000 in 7,655 men aged 40-81 years, of which 57% were CMV seropositive. Study  
39 participants were followed for 18±6.0 years (mean±SD). We used Cox proportional  
40 hazard models, adjusted for age and potential confounders to estimate hazard ratios  
41 (HR) with 95% confidence intervals (CI). CMV serostatus was not associated with  
42 prostate cancer incidence (adjusted HR 1.03, 95% CI 0.89-1.19, p=0.687, 138,652  
43 person-years). However, among prostate cancer patients, CMV seropositivity was  
44 associated with increased risk of prostate cancer-associated mortality (adjusted HR  
45 2.26, CI 95% 1.02-4.99, p=0.044, 4639 person-years), with 25% of seropositive and  
46 18% of seronegative prostate cancer patients dying from their disease during follow  
47 up. These results show that CMV seropositivity is associated with increased risk of  
48 prostate cancer death and suggest that CMV infection may contribute to prostate  
49 cancer lethality.

50  
51  
52  
53  
54  
55  
56  
57  
58  
59

## 60 INTRODUCTION

61 Prostate cancer is one of the most common cancers in men with over 350 000 prostate  
62 cancer deaths reported worldwide every year<sup>1</sup>. Whereas many prostate tumors are  
63 indolent, others can develop to metastatic disease, for which there is no cure. Few  
64 environmental factors have been linked to prostate cancer development, but the  
65 heritability of prostate cancer is 57%<sup>2</sup>, with more than 250 germline single nucleotide  
66 variants found to be associated with cancer incidence to date<sup>3</sup>. In contrast, only few  
67 germline events have been identified as risk factors for prostate cancer mortality,  
68 including carrying rare mutations in the gene *BRCA2*<sup>4</sup>, and potentially modifiable  
69 environmental factors may play a larger role in cancer progression. A probable  
70 relationship exists between smoking, obesity and advanced disease and risk for cancer  
71 progression, while physical activity might reduce this risk<sup>5</sup>. To date, tools that predict  
72 who will develop lethal prostate cancer are insufficient. For example, the commonly  
73 used Cancer of the Prostate Risk Assessment (CAPRA) score, which incorporates  
74 tumor features, s-PSA and age at diagnosis of localized prostate cancer, moderately  
75 predicts cancer-specific mortality (c-index 0.8)<sup>6</sup>. New biomarkers are essential to  
76 identify those at risk of lethal prostate cancer.

77  
78 Cytomegalovirus (CMV) is a human herpesvirus that establishes chronic infection and  
79 globally 83% are seropositive to CMV<sup>7</sup>. However, seroprevalence differs markedly  
80 around the world, with western countries having much lower rates than countries in  
81 Africa and Asia<sup>7</sup>. CMV infection is present in a large fraction of normal prostate glands,  
82 prostate tumors and bone metastases<sup>8,9</sup>. In a case-control study, CMV serostatus was  
83 not associated with prostate cancer incidence, suggesting that CMV does not cause  
84 prostate cancer<sup>10</sup>. CMV seropositivity is, however, associated with increased all-cause  
85 mortality<sup>11,12</sup>. In the US NHANES III cohort, CMV seropositive men had increased  
86 cancer mortality<sup>13</sup>, but it is unknown if CMV serostatus is specifically associated with  
87 prostate cancer mortality. We recently reported that local CMV T-cell immunity in the  
88 prostate is associated with disease recurrence after radical prostatectomy in carriers  
89 of the common allele HLA-A\*02-01<sup>14</sup>. Moreover, experimental CMV inhibition in  
90 models of prostate cancer can induce growth arrest and programmed cell death<sup>9</sup>.

91  
92 CMV seropositivity likely underestimates the infected proportion of the population  
93 because CMV DNA is often detected along with low abundance of CMV responsive B-

94 and/or T-cells in seronegative individuals<sup>15-26</sup>. These findings suggest that individuals  
95 are infected but have failed to mount a detectable antibody response. In cells of the  
96 hematopoietic lineage, CMV is more abundant in CMV seropositive persons, although  
97 CMV often is present but at lower levels in individuals without an antibody response<sup>27-</sup>  
98 <sup>29</sup>. Large interindividual variation exists in abundance of CMV infected epithelial cells  
99 in the prostate, ranging from 0-100%<sup>9</sup>, raising the question whether CMV serostatus  
100 could also be a marker of CMV abundance in the prostate.

101  
102 Here we found that CMV was more abundant in benign prostates and prostate tumors  
103 in CMV seropositive compared to CMV seronegative men, demonstrating that CMV  
104 seropositivity serves as a marker for widespread CMV infection of the prostate. When  
105 we analyzed the large European Prospective Investigation of Cancer (EPIC)-Norfolk  
106 population-based cohort study, CMV serostatus was not associated with prostate  
107 cancer incidence. However, CMV seropositivity was associated with increased  
108 prostate cancer mortality in patients diagnosed with prostate cancer.

109  
110  
111  
112  
113  
114  
115  
116  
117  
118  
119  
120  
121  
122  
123  
124  
125  
126  
127

128 **METHODS**

129 **Ethics Statement**

130 Ethical permission for study of human samples was granted by the regional ethics  
131 committee of Sweden (2010/313-31/3). Prostate tissue and blood samples were  
132 collected from post-mortem donors between 2015 and 2020 through KI Donatum,  
133 Karolinska Institutet, Stockholm, Sweden, as described in<sup>14</sup> and<sup>9</sup>; post-mortem cohort.

134  
135 De-identified prostate cancer FFPE tissue from prostatectomy specimens with  
136 matched plasma (age span 50-68 years of age) was received from the Prostate Cancer  
137 Biorepository Network (PCBN) biobank; prostatectomy cohort. Ethical permission for  
138 biobank tissue collection was obtained from the local institutional review board at  
139 Memorial Sloan Kettering Cancer Center, New York, USA (Protocol #15-025).

140  
141 The European Prospective Investigation of Cancer (EPIC)-Norfolk study was approved  
142 by the Norwich Local Research Ethics Committee (previously known as Norwich  
143 District Ethics Committee) (REC ref: 98CN01; 05/Q0101/191) and Waveney NHS  
144 Research Governance Committee (2005EC07L). All participants gave their informed  
145 written consent before entering the study. Permission to analyze EPIC-Norfolk data by  
146 Swedish researchers was granted by the Swedish Ethical Review Authority, ethical  
147 permit number 2021-00457 and its amendment 2022-00965-02.

148  
149 **Analyses of CMV immunity in post-mortem and prostatectomy cohorts**

150 We analyzed anti-CMV IgG titers in serum of post-mortem donors and in plasma of  
151 prostatectomy prostate cancer patients from PCBN using CMV IgG, CMIA assay  
152 (Architect, Abbott, Chicago, Illinois, USA). The cut-off value for a positive assay was  
153 6.0 arbitrary units (AU) and measured values up to 250. Samples that had titers of 250  
154 or higher were labeled  $\geq 250$ . Four post-mortem donors were analyzed by CMV IgG  
155 chemiluminescence immunoassay on the LIAISON®XL Analyzer. Here  $>14$  was  
156 considered positive (U/ml). We determined CMV IgG avidity using human anti-  
157 cytomegalovirus IgG ELISA Kit (ab108639, Abcam, Cambridge, UK) using low and  
158 high avidity controls (CMV IgG and IgG avidity EIA, DEIA465, Creative Diagnostics,  
159 New York, New York, USA). After sample incubation, wells were incubated with either  
160 1X wash buffer or 6M urea in 1X wash buffer for 10 minutes. We calculated an index

161 of CMV IgG avidity between non-urea and urea treated wells. High avidity: 0,80-1,00;  
162 Intermediate avidity: 0,65-0,79; Low avidity: <0,65.

163  
164 Virscan data with Virscores were extracted from<sup>14</sup>, in which the analysis was further  
165 described, and compared with epithelial CMV-pp71 abundance as analyzed in <sup>9</sup>. In  
166 brief, VirScan is a method to analyze antiviral IgG antibodies by using genetically  
167 engineered bacteriophages that display short peptides spanning viral genomes<sup>30</sup>.  
168 Prostate protein lysates were incubated with bacteriophages, IgG-bacteriophage  
169 complexes were captured using magnetic beads and sequenced. CMV VirScores,  
170 reflecting the number of CMV epitopes recognized by IgG antibodies in a sample, were  
171 determined as in<sup>31</sup>. The VirScan method is prone to false positive hits, and CMV  
172 VirScore of above five was here considered as CMV VirScore high.

173  
174 **Analyses of prostate tissues from post-mortem donors and prostate cancer**  
175 **patients**

176 Tissues were processed and analyzed as described in <sup>9</sup>. Immunohistochemistry  
177 protocols and imaging are described in <sup>9</sup>. This antibody was used: Cytomegalovirus  
178 pp71 (goat, 1:200, clone vC-20, sc-33323, polyclonal, Santa Cruz Biotechnology).

179  
180 Histological evaluation of prostate cancer and inflammation was assessed in H&E  
181 stained FFPE prostate slides by a trained pathologist. Cells with lymphocyte  
182 morphology in large and small clusters or spread out in the stroma were classified as  
183 chronic inflammation. Acute inflammation with neutrophile infiltration was detected in  
184 three prostates in which chronic inflammation was also detected. An incidental prostate  
185 cancer (Gleason score 3+3) was detected in a CMV seronegative subject. A suspected  
186 incidental prostate cancer was detected in a CMV seropositive subject but was difficult  
187 to further assess due to post-mortal effects on the tissue. Two other individuals had  
188 been treated for prostate cancer with local radiation and chemotherapy respectively.  
189 Medical history was obtained from medical journals, next of kin, police reports and  
190 patient registry, all in accordance with ethical permit 2010/313-31/3.

191  
192 In prostatectomy samples from PCBN (prostate cancer patients aged 50-68y),  
193 Gleason score and pathological T-stage were recorded by pathologists associated with

194 PCBN. Gleason grade groups 1-5 were derived from Gleason scores according to the  
195 International Society of Urological Pathology.

196

### 197 **Statistical analyses of post-mortem and prostatectomy cohorts**

198 All statistical analyses and plots for the cohort with post-mortem donors and the  
199 prostatectomy cohort were made in GraphPad prism 8.0 (GraphPad Software, San  
200 Diego, California, USA). Two-sided unpaired t-tests were performed on numerical  
201 continuous data with normal distribution. Groups with non-normal numerical  
202 continuous data was analyzed with Mann-Whitney test. Correlation analyses were  
203 performed with Pearson correlation analysis or Spearman correlation analysis when  
204 appropriate. Proportions between two groups was analyzed with Fisher's exact test.  
205 Non-normal distributed data with more than two groups was compared with Kruskal-  
206 Wallis multiple comparisons. Receiver operator characteristic (ROC) curves were  
207 constructed and Area under the curve (AUC) calculated using % CMV-pp71 epithelial  
208 abundance in CMV IgG- and CMV IgG+ donors or patients. Patients with CMV IgG  
209 titers of  $\geq 250$  were all treated as having CMV IgG titer 250 in analyses.

210

### 211 **EPIC-Norfolk cohort characteristics**

212 The EPIC-Norfolk study is a prospective population-based cohort in the UK that  
213 recruited study participants between 1993 and 1997, aged 40-79 years at time of  
214 inclusion. The cohort, with details on methods of data collection and follow up, has  
215 previously been described<sup>12,32</sup>. Participants subjected to CMV serology testing were  
216 randomly selected from the EPIC-Norfolk cohort<sup>12,33</sup>. End of follow-up was 2018 March  
217 31<sup>st</sup>.

218

### 219 **Serum CMV IgG measurements in the EPIC-Norfolk cohort**

220 In total, 7655 male study participants underwent CMV serology testing. CMV IgG  
221 serostatus was determined in serum from blood drawn on 1<sup>st</sup> health check (1993-1998,  
222 n=5894) and/or 2<sup>nd</sup> health check (1998-2000, n=3846). In blood collected at 1<sup>st</sup> health  
223 check, serum CMV IgG measurements were performed using an indirect  
224 chemiluminescence immunoassay (Liaison, Diasorin, Saluggia, Italy). The CMV  
225 serology assessment procedure in blood samples collected at 1<sup>st</sup> health check has  
226 previously been described in detail<sup>12</sup>. In blood collected at 2<sup>nd</sup> health check, CMV  
227 serostatus was determined by assaying CMV epitopes, performed at the German

228 Cancer Research Center, Heidelberg, Germany, as previously described<sup>34</sup>. In  
229 summary, antibodies against two or more antigens (CMV pp28, CMV pp52, CMV pp65,  
230 CMV pp150), with assay values above cut off values determined a priori, were  
231 considered as CMV seropositive.

232

### 233 **Variables collected at baseline in EPIC-Norfolk**

234 Self-reported information on smoking, diabetes mellitus, alcohol usage, Townsend  
235 index<sup>35</sup>, education level, Body Mass Index, Waist-hip ratio, social class, ethnic origin,  
236 and marital status were collected at 1<sup>st</sup> health check (1993-1998).

237

### 238 **Prostate cancer variables and endpoints in EPIC-Norfolk**

239 Information on prevalent (present at determination of CMV serostatus) and incident  
240 prostate cancer (diagnosed after determination of CMV serostatus) was ascertained  
241 using ICD-10 code C61 in the UK Cancer Registry until 2016 March 31<sup>st</sup>, the latest  
242 available UK Cancer Registry data. Information on prostate cancer diagnosis,  
243 documented using ICD-10 codes 185, C61, was extracted from hospital admission and  
244 mortality data until 2018 March 31<sup>st</sup>. Hospital admissions data include all ICD codes  
245 recorded at admissions to hospital, independent of the reason. Prostate cancer  
246 diagnosis at hospital admissions is registered as date of admission and not backdated  
247 to the date the patient received his diagnosis. Death certificates were obtained for all  
248 participants who died before end of follow up at 2018 March 31<sup>st</sup>. Prostate cancer as  
249 underlying cause of death (185, C61) was used as the endpoint prostate cancer  
250 mortality.

251

252 Information on prostate cancer stage at diagnosis was documented in the UK cancer  
253 register for 284 prostate cancer patients, with 278 being incident prostate cancer  
254 cases, divided into general American Joint Committee on Cancer (AJCC) stage groups  
255 using TNM classifications. Patients were divided into categories 1-4 and 6, of which  
256 category 6 had insufficient information to produce a valid stage. Categories 1-4 were  
257 used, which correspond to cancer stage I-IV. Cancer was classified into localized  
258 prostate cancer (stage I-II; local growth; T2 or lower, N0, M0) and advanced prostate  
259 cancer (stage III-IV; tumor has invaded surrounding tissue and/or presence of lymph  
260 node metastases and/or presence of distant metastases; T3 or higher, or N1 or M1).

261



## 262 **Statistical analyses of EPIC-Norfolk**

263 All analyses of EPIC-Norfolk data were executed in STATA SE 17 (Stata-Corp, College  
264 Station, Texas). All data available was included as specified below. No power  
265 calculations were conducted prior to this study. All tests of statistical significance were  
266 two-sided. P-value below 0.05 was considered statistically significant.

267  
268 Characteristics for variables were summarized using mean and standard deviation  
269 (SD) for continuous variables and percentages for binary variables. Townsend index  
270 was used as a continuous variable, as was alcohol consumption in units per week.  
271 Age-adjusted linear regression analyses were performed to compare these variables  
272 between CMV seronegative and CMV seropositive males and prostate cancer  
273 patients. Binary variables: Prevalent Diabetes Mellitus (0/1), Ever smokers (0/1), Social  
274 class: employment and above (0/1), Education; A level and above (0/1; A level  
275 corresponds to 12 years of school education in the UK), Marital status; married or not  
276 married (0/1), Body Mass Index ( $\geq 30$  or  $< 30$  kg/m<sup>2</sup>), Waist-Hip ratio ( $\geq 0.90$  or  $< 0.90$ ;  
277 according to WHO definitions of high risk Waist-Hip ratio), Ethnic origin Caucasian or  
278 non-Caucasian (black Caribbean, black other, Indian, Pakistani, Chinese, Other).  
279 Binary variables were compared between CMV seronegative and CMV seropositive  
280 males using logistic regression adjusted for age. Data completeness was 97% or  
281 higher for all individual variables.

282  
283 In time-to-event models, time from serostatus was determined using data from 1<sup>st</sup>  
284 health check or 2<sup>nd</sup> health check. These two health checks were two years apart. If a  
285 participant was CMV seronegative on both 1<sup>st</sup> health check and 2<sup>nd</sup> health check, time  
286 from CMV serostatus is determined as time from 1<sup>st</sup> health check. If a participant was  
287 seronegative on 1<sup>st</sup> health check and seropositive on 2<sup>nd</sup> health check, time from CMV  
288 serostatus is determined as time from 2<sup>nd</sup> health check. If a participant was seropositive  
289 on 1<sup>st</sup> health check and seronegative on 2<sup>nd</sup> health check, time from CMV serostatus  
290 is determined as time from 1<sup>st</sup> health check (this pattern was observed for a rare  
291 number of study participants with CMV serostatus data from both 1<sup>st</sup> health check and  
292 2<sup>nd</sup> health check; 47/1160: 4.1%). CMV IgG titers are stable over time<sup>36</sup>. As described  
293 in Table S2, CMV seroprevalence in matched age groups was lower in 2<sup>nd</sup> health check  
294 compared to 1<sup>st</sup> health check, implying that the sensitivity is lower, causing false  
295 negative CMV seronegative samples to occur.

296  
297  
298  
299  
300  
301  
302  
303  
304  
305  
306  
307  
308  
309  
310  
311  
312  
313  
314  
315  
316  
317  
318  
319  
320  
321  
322  
323  
324  
325  
326  
327  
328  
329

Time to prostate cancer was determined as time to first prostate cancer registration, either in the prostate cancer registry or by registration upon hospital admission. Time from prostate cancer diagnosis to prostate cancer mortality was determined as time from first prostate cancer registration (Figure 2). Censored subjects in time-to-event analyses were either censored due to death from other causes than prostate cancer or were censored at end of study (2018, March 31<sup>st</sup>).

In time-to-event models, only patients with no missing data were analyzed. Time to event analyses were performed in study participants and patient with  $\geq$  two years follow up excluding patients with prevalent prostate cancer. Time-to-event models were performed for all men from time of known serostatus to first prostate cancer registration or prostate cancer death and for prostate cancer patients from time of first registered prostate cancer diagnosis to prostate cancer death (Figure 2). Three time-to-event models were examined: 1) Unadjusted; 2) Adjusted for Age; 3) adjusted for Age, Smoking, Diabetes Mellitus, Body Mass Index, Waist-Hip Ratio, Education level and Townsend index. Assumptions of proportional hazards were examined by Schoenfeld residual statistical measures for each variable. If the assumption of proportional hazards was not fully justified for a variable, it was converted into a time-dependent variable in Cox proportional hazard models.

330 **RESULTS**

331 **Relationship between CMV serostatus and CMV infection in the prostate**

332 We recently reported that chronic CMV infection is common in the prostate using  
333 immunoblot, immunohistochemistry (IHC), quantitative PCR and in situ hybridization  
334 with the proportion of CMV infected cells in the prostate epithelium ranging from 0-  
335 100%<sup>9</sup>. To assess the relationship between CMV infection in the prostate and CMV  
336 serostatus, we measured CMV IgG in serum of 41 post-mortem donors aged 19-89 in  
337 whom we quantified CMV abundance in the prostate.

338  
339 In CMV seropositive post-mortem donors (24/41, 59%), the proportion of the prostate  
340 epithelial cells that was infected by CMV ranged from 2% to 100% with a mean of 58%,  
341 as assessed by the detection of the CMV protein pp71 by IHC (n=24, Figure 1A). It is  
342 well established that CMV infected individuals often are seronegative<sup>15-26</sup>, and  
343 prostates from the 17 CMV seronegative post-mortem donors were all CMV IHC  
344 positive, but epithelial abundance of CMV was significantly lower than in CMV  
345 seropositive post-mortem donors with a mean of 28% (p<0.0001, Figure 1A).

346  
347 We also found a positive association between a high CMV IgG VirScore in prostate  
348 tissue<sup>14,30</sup>, reflecting presence and diversity of CMV IgG antibodies, with CMV-pp71  
349 epithelial abundance (n=15, p=0.003) (Figure 1B), further supporting an association  
350 between CMV immunity and epithelial CMV infection. Prostates of CMV seropositive  
351 donors did not have higher prevalence of inflammatory infiltrates with lymphocytes than  
352 in CMV seronegative donors (Figure S1A). Neither was presence of inflammatory  
353 infiltrates associated with CMV abundance in CMV seronegative nor CMV seropositive  
354 donors (Figure S1B), ruling out general chronic inflammation as a mediator.

355  
356 A more pronounced association between CMV serostatus and prostate CMV  
357 abundance, determined with CMV-pp71 IHC, was observed in prostate cancer patients  
358 who underwent prostatectomy (Prostatectomy cohort). First, 3/10 of prostatectomy  
359 samples from CMV seronegative prostate cancer patients had CMV negative tumors  
360 and CMV negative benign epithelium (Figure 1C). Second, CMV was commonly found  
361 throughout the whole tumor in CMV seropositive patients (Figure 1C, n=10) whereas  
362 CMV was less abundant in the tumor in CMV seronegative patients (IgG+ vs IgG-,  
363 >90% CMV<sup>+</sup>: p=0.023, n=10 per group, Figure 1C). The median CMV tumor

364 abundance was 99% in CMV seropositive patients (n=10) and 47% in CMV  
365 seronegative patients (n=10) (p=0.016; Figure 1C).

366  
367 With higher age, titers of anti-CMV IgG antibodies increase, perhaps due to subclinical  
368 reactivation events<sup>28,37</sup>. Prostate CMV abundance is positively correlated with age<sup>9</sup>,  
369 but when we analyzed CMV seronegative and CMV seropositive donors separately,  
370 CMV abundance only increased with age in CMV seronegative donors (CMV IgG<sup>-</sup>:  
371 r=0.72, p=0.001; CMV IgG<sup>+</sup>: r=0.25, p=0.24; Figure S2A). Furthermore, serum CMV  
372 IgG titer did not correlate with prostate CMV abundance in CMV seropositive donors  
373 (r=0.03, p=0.90, Figure S2B) nor CMV abundance in prostate tumors in CMV  
374 seropositive prostate cancer patients (r=0.28, p=0.44, Figure S2C). High avidity of  
375 serum CMV IgG antibodies did not further discriminate CMV abundance (Figure S2D).  
376 In conclusion, measures of systemic CMV humoral immunity quality (IgG avidity) and  
377 quantity (IgG titer) could not be used to discriminate CMV abundance.

378  
379 We asked how well CMV serostatus distinguished abundance of CMV in prostate  
380 epithelium. Receiver operator characteristic (ROC) analyses showed that CMV  
381 seropositivity identifies prostates with higher CMV abundance in post-mortem donors  
382 (Area under the curve (AUC): 0.85 (CI 95% 0.73-0.97), p=0.0002) (Figure 1D) and in  
383 primary prostate tumors (AUC: 0.81 (CI 95% 0.61-1.00), p=0.0191) (Figure 1E).

384  
385 In summary, CMV seropositive men have higher abundance of CMV infected prostate  
386 cells than CMV seronegative men. Hence, CMV serostatus is a marker for CMV  
387 abundance in benign and malignant prostate tissue.

### 388 389 **EPIC-Norfolk male CMV cohort characteristics**

390 Next, we asked if CMV infection was associated with prostate cancer incidence or  
391 mortality. In order to do so, a large number of prostate specimens or blood samples  
392 are required. Since there is often CMV heterogeneity within a prostate, accurate  
393 assessment of CMV would entail analyzing large areas, which is difficult to do to in  
394 large scale. In contrast, CMV serostatus is analyzed with scalable assays in blood  
395 samples.

396

397 We used CMV serostatus to examine if CMV was associated with prostate cancer  
398 incidence and mortality (Figure 2A-B). In EPIC-Norfolk, a total of 7655 male  
399 participants aged 40-79 years at study recruitment in 1993-1997 were examined for  
400 CMV serostatus<sup>12,33</sup>. CMV serostatus was determined in serum from blood drawn  
401 1993-1998 (n=5894) and/or 1998-2000 (n=3846) in males aged 40-81 years. The  
402 study participants were followed for  $18\pm 6.0$  years (mean $\pm$ SD) from blood draw until the  
403 end of follow up due to death or end-of-study. Of the study participants, 57% were  
404 CMV seropositive on at least one blood test (Table S1, Figure 2). As expected, since  
405 CMV seropositivity increases with age<sup>38</sup> (Table S2), CMV seronegative participants  
406 were on average 2.9 years younger than CMV seropositive participants ( $58.6\pm 9.1$  vs  
407  $61.5\pm 9.2$  years; mean $\pm$ SD) (Table S1). In age-adjusted analyses, CMV seropositive  
408 men were more likely to be non-white, smokers, have high BMI, be married, have lower  
409 level of education and had addresses in areas of material deprivation, as measured by  
410 Townsend index score (Table S1).

411  
412 Prostate cancer diagnoses were identified through the UK cancer registry (n=759)  
413 and/or by hospital admissions (n=693), identifying a total of 839 prostate cancer  
414 patients (Figure S3). Most patients were diagnosed with prostate cancer after CMV  
415 serostatus was defined (incident cases, n=783, 93% of all cases) and 219 died from  
416 prostate cancer during the study period. Incident prostate cancers were registered  
417  $11.9\pm 6.0$  years after CMV serostatus analysis.

418  
419 Twenty prostate cancer patients had their cancer diagnoses registered at the same  
420 time as death from the disease, which is likely due to delayed registration of diagnosis.  
421 In addition, 11/205 (5.4%) of patients with localized prostate cancer stage at diagnosis  
422 in the Cancer Registry died within two years, further substantiating that this error  
423 occurs, as the 2-year survival of localized prostate cancer is nearly 100%. To account  
424 for this bias, all time to event analyses were performed in study participants and patient  
425 with  $\geq$  two years follow up.

#### 426 427 **CMV serostatus and prostate cancer incidence**

428 In total, 483 (61.7%) of the men diagnosed with prostate cancer during follow-up were  
429 CMV IgG<sup>+</sup> at the time of blood draw. CMV seropositive men were on average 2.5 years  
430 older (mean  $76.1\pm$  SD 7.9) than CMV seronegative men (mean  $73.6\pm$  SD 7.8) when

431 their incident prostate cancer diagnoses were registered. CMV seropositivity was not  
432 associated with increased risk of prostate cancer incidence during follow up in Cox  
433 proportional hazard models adjusted for age (HR 0.99, 95% CI 0.85-1.14,  $p=0.848$ ) or  
434 smoking, diabetes mellitus, body mass index, waist-hip ratio, education level and  
435 Townsend index in addition to age (HR 1.03, 95% CI 0.89-1.19,  $p=0.687$ ) (Table 1).  
436 Estimated crude incidence rate ratios (IRR) did not show an association between CMV  
437 and prostate cancer incidence (IRR 1.14 95% CI 0.99-1.32,  $p=0.068$ , 138,652 person-  
438 years) (Table S3). In addition, prostate cancer patients aged 50-68 years who  
439 underwent prostatectomy (prostatectomy cohort) were not largely CMV seropositive  
440 (CMV IgG-: 19/40, CMV IgG+: 21/40, Figure S4A). In conclusion, we find no evidence  
441 of a general association between CMV and prostate cancer incidence.

442

#### 443 **CMV and prostate cancer characteristics**

444 We next asked if CMV serostatus is associated with known prognostic prostate cancer  
445 features. CMV seropositivity was not more prevalent in patients with advanced  
446 compared to localized prostate cancer in EPIC-Norfolk at time of diagnosis ( $n=278$ ,  
447 age-adjusted  $p=0.487$ , advanced prostate cancer CMV seronegative: 31% and CMV  
448 seropositive: 27%; localized prostate cancer CMV seronegative: 69% and CMV  
449 seropositive: 73%, Table S4). In the prostatectomy cohort ( $n=40$ ), prostate cancer  
450 patients had T-stage pT2 or pT3 tumors with varying Gleason scores. CMV  
451 seropositivity was not associated with T-stage ( $p=0.205$ ; Fisher's exact test; Figure  
452 S4B) nor Gleason grade group ( $p=0.078$ ; Fisher's exact test; Figure S4C). CMV  
453 abundance in primary prostate tumors ( $n=20$ ) was not significantly associated with  
454 Gleason score (grade group) or T-stage (Figure S4D-E, prostatectomy cohort). In  
455 summary, CMV serostatus was not associated with the known prostate cancer  
456 prognostic risk factors advanced prostate cancer stage, Gleason score or T-stage at  
457 diagnosis, but appears to be an independent parameter.

458

#### 459 **CMV serostatus and prostate cancer mortality**

460 Examining all men in the EPIC-Norfolk cohort, an association between CMV serostatus  
461 and prostate cancer mortality was not apparent (adjusted HR 1.24, CI 95% 0.92-1.67,  
462  $p=0.166$ ,  $n=7375$ , Table 2) but an effect of CMV seropositivity on all-cause mortality  
463 adjusted for age and potential confounders was found (adjusted HR 1.10, CI 95% 1.02-

464 1.18,  $p=0.019$ ,  $n=7375$ , Table 2). Crude incidence rate ratios for all mortality analyses  
465 are reported in supplemental Table 7.

466  
467 We next examined if CMV serostatus was associated with all-cause and prostate  
468 cancer mortality specifically among patients diagnosed with prostate cancer. Of  
469 incident prostate cancer patients, CMV seronegative patients were followed for  $7.9\pm 4.3$   
470 years (mean $\pm$ SD) and CMV seropositive patients were followed for  $7.6\pm 4.4$  years  
471 (mean $\pm$ SD) after prostate cancer registration. CMV seropositive prostate cancer  
472 patients did not display increased all-cause mortality compared to CMV seronegative  
473 prostate cancer patients, as examined in Cox proportional hazard models adjusted for  
474 age and other potential confounders (fully adjusted HR 1.17, CI 95% 0.92-1.50,  
475  $p=0.206$ ,  $n=588$ , Table 2).

476  
477 During follow up, 24.7% of CMV seropositive patients and 17.6% of CMV seronegative  
478 prostate cancer patients died from their disease. CMV seropositivity was associated  
479 with higher risk of prostate cancer mortality in unadjusted (HR 2.47, CI 95% 1.12-5.43,  
480  $p=0.024$ ,  $n=597$ ) and age-adjusted (HR 2.32, CI 95% 1.06-5.13,  $p=0.036$ ,  $n=597$ ) Cox  
481 proportional hazard models. The association persisted after adjusting for the potential  
482 confounders smoking, diabetes mellitus, body mass index, waist-hip ratio, education  
483 level and Townsend index in addition to age (HR 2.26, CI 95% 1.02-4.99,  $p=0.044$ ,  
484  $n=588$ ) (Table 2).

485  
486 We conclude that CMV seropositivity, which correlated with higher abundance of  
487 CMV in prostate epithelial cells, was associated with increased cancer mortality in  
488 prostate cancer patients.

489  
490  
491  
492  
493  
494  
495  
496  
497

498 **DISCUSSION**

499 We report that CMV infection is more widespread in epithelial cells in the healthy  
500 prostate and in prostate cancer in CMV seropositive compared to seronegative men,  
501 establishing CMV serostatus as a marker for CMV abundance in the prostate. In a  
502 large prospective cohort, CMV serostatus was not associated with prostate cancer  
503 incidence, corroborating previous research that found no association between DNA  
504 virus immunity and risk of prostate cancer<sup>10,39,40</sup>. These findings imply that CMV is not  
505 an important cause of primary prostate cancer. We, however, report a positive  
506 association between CMV seropositivity and prostate cancer mortality in prostate  
507 cancer patients, independent of potential confounders such as obesity, smoking and  
508 low socioeconomic status.

509  
510 Many men who were CMV seronegative still had CMV infected prostates. This is not  
511 surprising, as it is well established that CMV serostatus substantially underestimates  
512 the proportion of individuals who are infected by CMV<sup>15-22</sup>. Thus, we are not exclusively  
513 comparing groups of individuals who are CMV infected or not, but who are infected to  
514 varying degrees. Importantly, this raises the possibility that CMV potentially also may  
515 affect prostate cancer mortality in the CMV seronegative group, but to a lesser extent,  
516 and that the increased mortality after prostate cancer diagnosis in seropositive prostate  
517 cancer patients may underestimate the true effect of CMV. Interestingly, CMV IgG titer  
518 in blood could not be used to distinguish prostates with highest CMV abundance.  
519 Factors such as age at infection and CMV strain variability may be more important.

520  
521 This study has several strengths, including long follow-up time and high data  
522 completeness. Furthermore, no study participants were lost during follow up other than  
523 due to death prior to study completion. This study also has limitations. Over 99% of  
524 study participants were of Caucasian ethnicity, all living in the UK. It is therefore difficult  
525 to generalize the study results to other populations such as African American men in  
526 USA or men in east Asia, two groups that display increased risk of prostate cancer  
527 mortality and have high CMV seroprevalence<sup>1,7,38,41</sup>. Although excluding participants  
528 with less than two years follow up potentially reduced effects of bias introduced by late  
529 registration of prostate cancer diagnoses, this strategy may potentially exclude a small  
530 fraction of prostate cancer patients diagnosed with *de novo* metastatic prostate cancer  
531 with poor outcome.



532

533 CMV seropositivity may be a marker of an altered immune system or of a yet  
534 unidentified confounder that could explain the observed associations. Additionally,  
535 CMV seropositivity could perhaps select for an earlier death from non-cancer causes  
536 and result in selective survival bias, as CMV seropositivity is associated with all-cause  
537 mortality and particularly mortality from cardiovascular disease<sup>11,12</sup>. However, we  
538 expect that any possible bias by selective survival is small and would not account for  
539 our observations. A main cause of death among prostate cancer patients is  
540 cardiovascular disease, and may therefore be a competing risk of death, particularly  
541 among CMV seropositive men<sup>42</sup>. An association between CMV serostatus and  
542 prostate cancer mortality is not as evident when analyzing all men in our cohort from  
543 age of CMV serology, which may relate to the lack of increased incidence and  
544 competing hazards.

545

546 The proportion of prostate cancer patients in EPIC-Norfolk diagnosed via s-PSA testing  
547 or by showing clinical signs is unknown but could impact study results. CMV  
548 seronegative men may be more likely to enroll in s-PSA testing as they in general have  
549 higher socioeconomic status than CMV seropositive men (Table S1), which could  
550 increase the number of indolent prostate cancer cases in CMV seronegative men.  
551 However, adjusting for education level, Townsend index and smoking, among other  
552 factors, did not reduce the effect measure of CMV's association with prostate cancer  
553 mortality (Table 2). Furthermore, the proportion of patients with advanced cancer  
554 disease at diagnosis in EPIC-Norfolk was not dependent on CMV serostatus (Table  
555 S3), which suggests that confounding due to different diagnostic intensity is  
556 improbable. Rather, trends in EPIC-Norfolk and prostatectomy cohorts suggest that  
557 CMV seronegative patients may perhaps be diagnosed with prostate cancer with  
558 higher T-stage and Gleason scores than CMV seropositive patients (Table S4, Figure  
559 S4B-C). Previous research has shown that there is no association between CMV  
560 serostatus and Gleason score<sup>10</sup>. The limited information on prostate cancer features  
561 and low patient number in our study impede further exploration.

562

563 CMV may drive prostate cancer progression and metastatic spread independent of  
564 cellular differentiation (represented by Gleason score) and local invasion (represented  
565 by T-stage), perhaps through early seeding. This is in contrast to prostate cancer

566 associated bacteria that may be associated with Gleason score<sup>43</sup> and characteristics  
567 of advanced disease<sup>44,45</sup>. This could be due to direct and indirect effects of CMV, For  
568 example, CMV-directed T-cells can skew immune responses<sup>46</sup> and potentially be pro-  
569 metastatic. In prostate cancer models, CMV directly promotes cell viability and  
570 proliferation<sup>9</sup>, two crucial features of malignant cells that allow tumors to accumulate  
571 alterations, perhaps induced by CMV, that result in metastatic disease.

572

573 It will be important to validate the potential of CMV seropositivity as a risk factor for  
574 prostate cancer mortality in clinical cohorts, to further examine associations with  
575 clinical factors, including treatment modality, s-PSA and family history of prostate  
576 cancer. The potential added value of a CMV based assay, such as CMV serology, in  
577 prostate cancer prognosis models will be essential to define but was not possible to  
578 determine in this study. CMV promotes androgen signaling in prostate cancer and can  
579 modulate cellular processes that are associated with resistance to therapies for  
580 advanced prostate cancer<sup>9</sup>. It will be important to define if CMV is a predictive marker  
581 for the efficiency of anti-androgen therapies. Drugs that target CMV resulted in  
582 inhibited growth and induced cancer cell death in CMV infected prostate cancer  
583 models<sup>9</sup>. CMV serostatus has the potential to guide treatment choices and direct  
584 patient treatment in clinical trials of anti-viral therapies such as maribavir and  
585 letermovir<sup>9</sup>, with the hope that these, or other CMV targeted drugs, will prolong survival  
586 of prostate cancer patients.

587

588

589

590

591

592

593

594

595

596

597

598

599

600 **ACKNOWLEDGEMENTS**

601 All authors contributed to the study conception, study design, analysis, and  
602 interpretation of data. J.C and J.F wrote the manuscript with input from all authors. We  
603 thank the MRC Epidemiology Unit for access to data in the EPIC-Norfolk cohort. We  
604 thank the Karolinska University Hospital Clinical Microbiology Laboratory where CMV  
605 serology assays were performed for post-mortem and prostatectomy cohorts. We  
606 thank Professor Hans-Olov Adami and Lars Björnebo for valuable input on the  
607 manuscript. J.F and E.GK had full access to all the data in the study and takes  
608 responsibility for the integrity of the data and the accuracy of the data analysis.

609

610 **FUNDING**

611 This study was supported by grants from the Swedish Research Council (D0761801),  
612 the Swedish Cancer Society (19 0452 Pj, 22 2358 Pj), the Swedish Foundation for  
613 Strategic Research (SB16-0014) and Knut och Alice Wallenbergs Stiftelse  
614 (2018.0063). The PCBN biobank is supported by the Department of Defense Prostate  
615 Cancer Research Program Award No W81XWH-14-2-0182, W81XWH-14-2-0183,  
616 W81XWH-14-2-0185, W81XWH-14-2-0186, and W81XWH-15-2-0062 Prostate  
617 Cancer Biorepository Network. J.C was supported by the Clinical Scientist Training  
618 Program at Karolinska Institutet. E.GK was supported by the NIHR Cambridge  
619 Biomedical Research Centre (NIHR203312). The views expressed are those of the  
620 authors and not necessarily those of the NIHR or the Department of Health and Social  
621 Care.

622

623

624

625

626

627

628

629

630

631

632

633

634 **REFERENCES**

635

- 636 1. Culp MB, Soerjomataram I, Efstathiou JA, Bray F, Jemal A. Recent Global Patterns in  
637 Prostate Cancer Incidence and Mortality Rates. *Eur Urol.* 2020;77(1):38-52.
- 638 2. Mucci LA, Hjelmborg JB, Harris JR, et al. Familial Risk and Heritability of Cancer  
639 Among Twins in Nordic Countries. *JAMA.* 2016;315(1):68-76.
- 640 3. Karunamuni RA, Huynh-Le MP, Fan CC, et al. Additional SNPs improve risk  
641 stratification of a polygenic hazard score for prostate cancer. *Prostate Cancer*  
642 *Prostatic Dis.* 2021;24(2):532-541.
- 643 4. Rawla P. Epidemiology of Prostate Cancer. *World J Oncol.* 2019;10(2):63-89.
- 644 5. Adami H-O, Hunter DJ, Lagiou P, Mucci LA. *Textbook of cancer epidemiology.* Third  
645 edition. ed. Oxford ; New York: Oxford University Press; 2018.
- 646 6. Cooperberg MR, Broering JM, Carroll PR. Risk assessment for prostate cancer  
647 metastasis and mortality at the time of diagnosis. *J Natl Cancer Inst.*  
648 2009;101(12):878-887.
- 649 7. Zuhair M, Smit GSA, Wallis G, et al. Estimation of the worldwide seroprevalence of  
650 cytomegalovirus: A systematic review and meta-analysis. *Rev Med Virol.*  
651 2019;29(3):e2034.
- 652 8. Samanta M, Harkins L, Klemm K, Britt WJ, Cobbs CS. High prevalence of human  
653 cytomegalovirus in prostatic intraepithelial neoplasia and prostatic carcinoma. *J Urol.*  
654 2003;170(3):998-1002.
- 655 9. Classon J, Stenudd M, Zamboni M, Alkass K, Eriksson C-J, Pedersen L, Schörling A,  
656 Thoss A, Bergh A, Wikström P, Adami H-O, Sørensen HT, Druid H, Frisén J.  
657 Cytomegalovirus promotes proliferation and survival of prostate cancer cells and  
658 constitutes a therapeutic target. *BioRxiv* 2023;10.1101/2023.10.01.560348
- 659 10. Sutcliffe S, Till C, Gaydos CA, et al. Prospective study of cytomegalovirus serostatus  
660 and prostate cancer risk in the Prostate Cancer Prevention Trial. *Cancer Causes*  
661 *Control.* 2012;23(9):1511-1518.
- 662 11. Simanek AM, Dowd JB, Pawelec G, Melzer D, Dutta A, Aiello AE. Seropositivity to  
663 cytomegalovirus, inflammation, all-cause and cardiovascular disease-related  
664 mortality in the United States. *PLoS One.* 2011;6(2):e16103.
- 665 12. Gkrania-Klotsas E, Langenberg C, Sharp SJ, Luben R, Khaw KT, Wareham NJ.  
666 Seropositivity and higher immunoglobulin g antibody levels against cytomegalovirus  
667 are associated with mortality in the population-based European prospective  
668 investigation of Cancer-Norfolk cohort. *Clin Infect Dis.* 2013;56(10):1421-1427.
- 669 13. Okedele OO, Nelson HH, Oyenuga ML, Thyagarajan B, Prizment A. Cytomegalovirus  
670 and cancer-related mortality in the national health and nutritional examination  
671 survey. *Cancer Causes Control.* 2020;31(6):541-547.
- 672 14. Classon J, Zamboni M, Engblom C, et al. Prostate cancer disease recurrence after  
673 radical prostatectomy is associated with HLA type and local cytomegalovirus  
674 immunity. *Mol Oncol.* 2022.
- 675 15. Stanier P, Taylor DL, Kitchen AD, Wales N, Tryhorn Y, Tyms AS. Persistence of  
676 cytomegalovirus in mononuclear cells in peripheral blood from blood donors. *BMJ.*  
677 1989;299(6704):897-898.

- 678 16. Taylor-Wiedeman J, Sissons JG, Borysiewicz LK, Sinclair JH. Monocytes are a major  
679 site of persistence of human cytomegalovirus in peripheral blood mononuclear cells.  
680 *J Gen Virol.* 1991;72 ( Pt 9):2059-2064.
- 681 17. Kraat YJ, Hendrix MG, Wijnen RM, et al. Detection of latent human cytomegalovirus  
682 in organ tissue and the correlation with serological status. *Transpl Int.* 1992;5 Suppl  
683 1:S613-616.
- 684 18. Zhang LJ, Hanff P, Rutherford C, Churchill WH, Crumpacker CS. Detection of human  
685 cytomegalovirus DNA, RNA, and antibody in normal donor blood. *J Infect Dis.*  
686 1995;171(4):1002-1006.
- 687 19. Mendelson M, Monard S, Sissons P, Sinclair J. Detection of endogenous human  
688 cytomegalovirus in CD34+ bone marrow progenitors. *J Gen Virol.* 1996;77 ( Pt  
689 12):3099-3102.
- 690 20. Hendrix RM, Wagenaar M, Slobbe RL, Bruggeman CA. Widespread presence of  
691 cytomegalovirus DNA in tissues of healthy trauma victims. *J Clin Pathol.*  
692 1997;50(1):59-63.
- 693 21. Larsson S, Soderberg-Naucleer C, Wang FZ, Moller E. Cytomegalovirus DNA can be  
694 detected in peripheral blood mononuclear cells from all seropositive and most  
695 seronegative healthy blood donors over time. *Transfusion.* 1998;38(3):271-278.
- 696 22. Roback JD, Hillyer CD, Drew WL, et al. Multicenter evaluation of PCR methods for  
697 detecting CMV DNA in blood donors. *Transfusion.* 2001;41(10):1249-1257.
- 698 23. Loeth N, Assing K, Madsen HO, Vindelov L, Buus S, Stryhn A. Humoral and cellular  
699 CMV responses in healthy donors; identification of a frequent population of CMV-  
700 specific, CD4+ T cells in seronegative donors. *PLoS One.* 2012;7(2):e31420.
- 701 24. Litjens NHR, Huang L, Dedeoglu B, Meijers RWJ, Kwekkeboom J, Betjes MGH.  
702 Protective Cytomegalovirus (CMV)-Specific T-Cell Immunity Is Frequent in Kidney  
703 Transplant Patients without Serum Anti-CMV Antibodies. *Front Immunol.*  
704 2017;8:1137.
- 705 25. Terlutter F, Caspell R, Nowacki TM, et al. Direct Detection of T- and B-Memory  
706 Lymphocytes by ImmunoSpot(R) Assays Reveals HCMV Exposure that Serum  
707 Antibodies Fail to Identify. *Cells.* 2018;7(5).
- 708 26. Ashokkumar C, Green M, Soltys K, et al. CD154-expressing CMV-specific T cells  
709 associate with freedom from DNAemia and may be protective in seronegative  
710 recipients after liver or intestine transplantation. *Pediatr Transplant.*  
711 2020;24(1):e13601.
- 712 27. Jackson SE, Sedikides GX, Okecha G, Poole EL, Sinclair JH, Wills MR. Latent  
713 Cytomegalovirus (CMV) Infection Does Not Detrimentally Alter T Cell Responses in  
714 the Healthy Old, But Increased Latent CMV Carriage Is Related to Expanded CMV-  
715 Specific T Cells. *Front Immunol.* 2017;8:733.
- 716 28. Parry HM, Zuo J, Frumento G, et al. Cytomegalovirus viral load within blood increases  
717 markedly in healthy people over the age of 70 years. *Immun Ageing.* 2016;13:1.
- 718 29. Slobedman B, Mocarski ES. Quantitative analysis of latent human cytomegalovirus. *J*  
719 *Virol.* 1999;73(6):4806-4812.
- 720 30. Xu GJ, Kula T, Xu Q, et al. Viral immunology. Comprehensive serological profiling of  
721 human populations using a synthetic human virome. *Science.*  
722 2015;348(6239):aaa0698.
- 723 31. Pou C, Nkulikiyimfura D, Henckel E, et al. The repertoire of maternal anti-viral  
724 antibodies in human newborns. *Nat Med.* 2019;25(4):591-596.

- 725 32. Day N, Oakes S, Luben R, et al. EPIC-Norfolk: study design and characteristics of the  
726 cohort. European Prospective Investigation of Cancer. *Br J Cancer*. 1999;80 Suppl  
727 1:95-103.
- 728 33. Gkrania-Klotsas E, Langenberg C, Sharp SJ, Luben R, Khaw KT, Wareham NJ. Higher  
729 immunoglobulin G antibody levels against cytomegalovirus are associated with  
730 incident ischemic heart disease in the population-based EPIC-Norfolk cohort. *J Infect*  
731 *Dis*. 2012;206(12):1897-1903.
- 732 34. Mentzer AJ, Brenner N, Allen N, et al. Identification of host-pathogen-disease  
733 relationships using a scalable multiplex serology platform in UK Biobank. *Nat*  
734 *Commun*. 2022;13(1):1818.
- 735 35. Phillimore P, Beattie A, Townsend P. Widening inequality of health in northern  
736 England, 1981-91. *BMJ*. 1994;308(6937):1125-1128.
- 737 36. Samson LD, van den Berg SP, Engelfriet P, et al. Limited effect of duration of CMV  
738 infection on adaptive immunity and frailty: insights from a 27-year-long longitudinal  
739 study. *Clin Transl Immunology*. 2020;9(10):e1193.
- 740 37. Komatsu H, Sierro S, A VC, Klenerman P. Population analysis of antiviral T cell  
741 responses using MHC class I-peptide tetramers. *Clin Exp Immunol*. 2003;134(1):9-12.
- 742 38. Bate SL, Dollard SC, Cannon MJ. Cytomegalovirus seroprevalence in the United  
743 States: the national health and nutrition examination surveys, 1988-2004. *Clin Infect*  
744 *Dis*. 2010;50(11):1439-1447.
- 745 39. Korodi Z, Wang X, Tedeschi R, Knekt P, Dillner J. No serological evidence of  
746 association between prostate cancer and infection with herpes simplex virus type 2  
747 or human herpesvirus type 8: a nested case-control study. *J Infect Dis*.  
748 2005;191(12):2008-2011.
- 749 40. Sutcliffe S, Giovannucci E, Gaydos CA, et al. Plasma antibodies against Chlamydia  
750 trachomatis, human papillomavirus, and human herpesvirus type 8 in relation to  
751 prostate cancer: a prospective study. *Cancer Epidemiol Biomarkers Prev*.  
752 2007;16(8):1573-1580.
- 753 41. Mahal BA, Berman RA, Taplin ME, Huang FW. Prostate Cancer-Specific Mortality  
754 Across Gleason Scores in Black vs Nonblack Men. *JAMA*. 2018;320(23):2479-2481.
- 755 42. Shikanov S, Kocherginsky M, Shalhav AL, Eggener SE. Cause-specific mortality  
756 following radical prostatectomy. *Prostate Cancer Prostatic Dis*. 2012;15(1):106-110.
- 757 43. Banerjee S, Alwine JC, Wei Z, et al. Microbiome signatures in prostate cancer.  
758 *Carcinogenesis*. 2019;40(6):749-764.
- 759 44. Hurst R, Meader E, Gihawi A, et al. Microbiomes of Urine and the Prostate Are Linked  
760 to Human Prostate Cancer Risk Groups. *Eur Urol Oncol*. 2022.
- 761 45. Pernigoni N, Zagato E, Calcinotto A, et al. Commensal bacteria promote endocrine  
762 resistance in prostate cancer through androgen biosynthesis. *Science*.  
763 2021;374(6564):216-224.
- 764 46. Moss P. 'From immunosenescence to immune modulation': a re-appraisal of the role  
765 of cytomegalovirus as major regulator of human immune function. *Med Microbiol*  
766 *Immunol*. 2019;208(3-4):271-280.
- 767
- 768

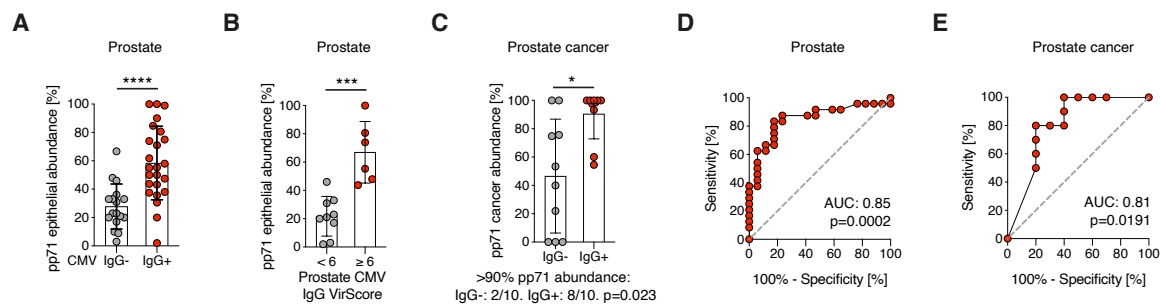

## Figure 1: Relationship between CMV infection in the prostate and CMV serostatus

**A)** Quantification of percentage CMV-pp71 abundance in prostate areas with epithelial cells in prostate from post-mortem donors. Difference between CMV seronegative (IgG<sup>-</sup>; n=17) and CMV seropositive (IgG<sup>+</sup>; n=24) men was examined with un-paired two-tailed t-test.  $p < 0.0001 = ****$ . Bar graph shows mean $\pm$ SD. **B)** Abundance of CMV-pp71 (%) in prostates with high prostate CMV IgG VirScore ( $\geq 6$ ) compared to low CMV IgG VirScore ( $< 6$ ), n=15, analyzed with un-paired two-tailed t-test.  $P < 0.001 = ***$ . Bar graph shows mean $\pm$ SD. **C)** Abundance of CMV-pp71 (%) in tumors, determined with IHC, compared between CMV seronegative (IgG<sup>-</sup>; n=10) and CMV seropositive (IgG<sup>+</sup>; n=10) prostate cancer patients with Mann-Whitney test. Bar graph shows mean $\pm$ SD.  $P < 0.05 = *$ . Analysis underneath graph shows Fisher's exact test of fraction of samples with >90% cancer CMV abundance comparing CMV seropositive (2/10) and seronegative (8/10) patients. **D)** Receiver operator characteristic (ROC) curve for CMV-pp71 epithelial abundance (%) in CMV seropositive post-mortem donors in (A) (in red) compared to CMV seronegative post-mortem donors in (A) (in grey). AUC = Area under the curve. **E)** ROC curve for CMV-pp71 cancer abundance in CMV seropositive prostate cancer patients in (C) (in red) compared to CMV seronegative prostate cancer patients in (C) (in grey). AUC = Area under the curve.

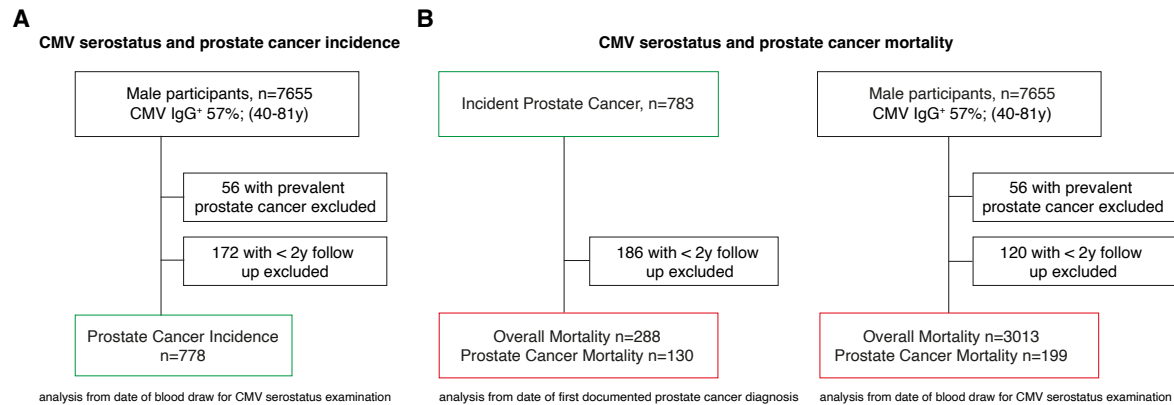

**Figure 2: Flow charts of EPIC-Norfolk CMV and prostate cancer study**

**A)** Study design of the EPIC-Norfolk cohort in which CMV serostatus (CMV IgG<sup>-</sup> vs CMV IgG<sup>+</sup>) and risk of prostate cancer (prostate cancer incidence) was examined. Patients with prevalent prostate cancer and those with less than two years follow up time from CMV serostatus determination to a documented prostate cancer diagnosis were excluded. **B)** Study design of the EPIC-Norfolk cohort in which CMV serostatus (CMV IgG<sup>-</sup> vs CMV IgG<sup>+</sup>) and risk of overall mortality and prostate cancer mortality was examined. All men in the cohort, excluding patients with prevalent prostate cancer and those with less than two years follow up time from CMV serostatus determination to death were analyzed. Patients with incident prostate cancer with more than two years follow up were examined in independent analyses. Green boxes indicate prostate cancer cases. Red boxes indicate mortality as endpoint in analyses.



|                           | <b>Hazard ratio (CI 95%)</b> | <b>p-value</b> |                    |
|---------------------------|------------------------------|----------------|--------------------|
| Model 1 (Un-adjusted)     | 1.17 (1.01-1.34)             | 0.035          | n=7427, 778 events |
| Model 2 (age-adjusted)    | 0.99 (0.85-1.14)             | 0.848          | n=7427, 778 events |
| Model 3 (fully adjusted)* | 1.03 (0.89-1.19)             | 0.687          | n=7324, 766 events |

**Table 1: CMV seropositivity and prostate cancer incidence**

\*Adjusted for Age, Townsend index, Diabetes Mellitus, Body Mass Index, Waist-Hip Ratio, Education level and Smoking. Cox proportional hazard models. CI: Confidence Interval.

|                                                                   | <b>Hazard ratio (CI 95%)</b> | <b>p-value</b> |                     |
|-------------------------------------------------------------------|------------------------------|----------------|---------------------|
| <b>All-cause mortality in patients with prostate cancer</b>       |                              |                |                     |
| Model 1 (Un-adjusted)                                             | 1.35 (1.06-1.72)             | 0.014          | N=597, 288 events   |
| Model 2 (age-adjusted)                                            | 1.21 (0.95-1.54)             | 0.121          | N=597, 288 events   |
| Model 3 (fully adjusted)*                                         | 1.17 (0.92-1.50)             | 0.206          | N=588, 281 events   |
| <b>Prostate cancer mortality in patients with prostate cancer</b> |                              |                |                     |
| Model 1 (Un-adjusted)                                             | 2.47 (1.12-5.43)             | 0.024          | N=597, 130 events   |
| Model 2 (age-adjusted)                                            | 2.32 (1.06-5.13)             | 0.036          | N=597, 130 events   |
| Model 3 (fully adjusted)*                                         | 2.26 (1.02-4.99)             | 0.044          | N=588, 126 events   |
| <b>All-cause mortality in all men</b>                             |                              |                |                     |
| Model 1 (Un-adjusted)                                             | 1.45 (1.34-1.56)             | <0.001         | N=7479, 3013 events |
| Model 2 (age-adjusted)                                            | 1.11 (1.03-1.20)             | 0.006          | N=7479, 3013 events |
| Model 3 (fully adjusted)*                                         | 1.10 (1.02-1.18)             | 0.019          | N=7375, 2960 events |
| <b>Prostate cancer mortality in all men</b>                       |                              |                |                     |
| Model 1 (Un-adjusted)                                             | 1.61 (1.20-2.17)             | 0.001          | N=7479, 199 events  |
| Model 2 (age-adjusted)                                            | 1.24 (0.92-1.67)             | 0.155          | N=7479, 199 events  |
| Model 3 (fully adjusted)*                                         | 1.24 (0.92-1.67)             | 0.164          | N=7375, 193 events  |

**Table 2: CMV seropositivity, prostate cancer mortality and all-cause mortality**

Prostate cancer patients are defined as incident cases, i.e. that their diagnoses are registered after CMV serostatus examination. CMV seropositive patients are compared to CMV seronegative patients. \*Adjusted for Age, Townsend index, Diabetes Mellitus, Body Mass Index, Waist-Hip Ratio, Education level and Smoking. Cox proportional hazard models. CI: Confidence Interval.
